# Supplementary material for: Genetic Structure and Geographical Differentiation of Traditional Rice (Oryza sativa L.) from Northern Vietnam
Source: MDPI journal article supplement (doi:10.3390/plants10102094), 2021-10-03
Supplement: s1 [file s1]

## Supplementary Files

# Genetic Structure and Geographical Differentiation of Traditional Rice (*Oryza sativa* L.) from northern Vietnam

Ngoc Ha Luong <sup>1</sup>, Le-Hung Linh <sup>2</sup>, Kyu-Chan Shim <sup>1</sup>, Cheryl Adeva <sup>1</sup>, Hyun-Sook Lee <sup>1, 3</sup>, and Sang-Nag Ahn <sup>1,\*</sup>

<sup>1</sup> Department of Agronomy, Chungnam National University, Daejeon 34134, Korea; luongngocha.biotech@gmail.com (N.H.L.); zktnrl@naver.com (K.-C.S.); ccadeva\_758@yahoo.com (C.A.)

<sup>2</sup> Agricultural Genetics Institute, North Tu Liem District, Hanoi City, Vietnam; lehunglinhbio@gmail.com (L.-H.L.)

<sup>3</sup> Present address: Crop Breeding Division, National Institute of Crop Science, Wanju-Gun 55365, Korea; Leehs0107@gmail.com

\* Correspondence: ahnsn@cnu.ac.kr; Tel.: +82-42-821-5728

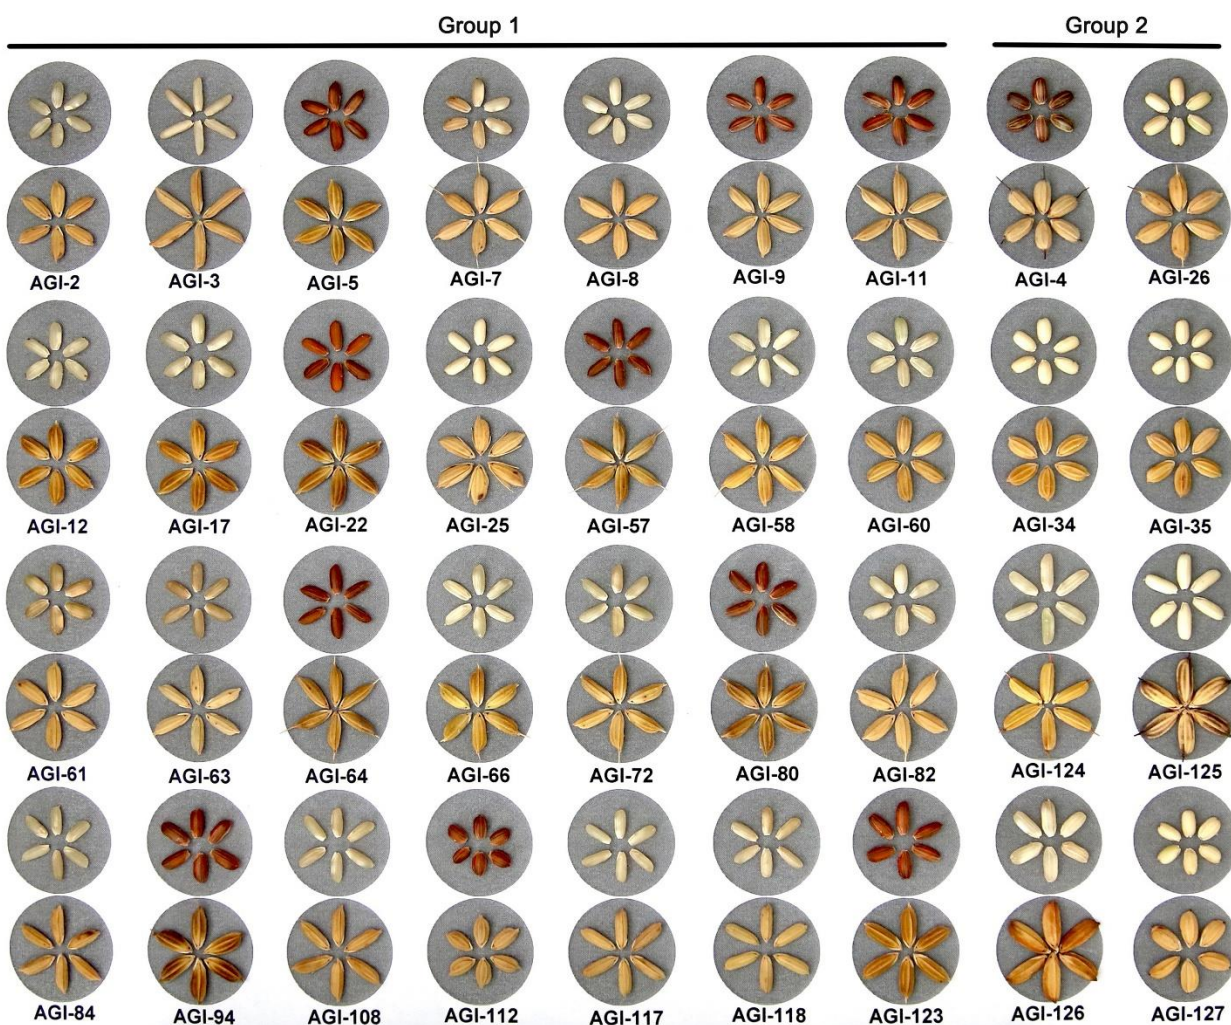

**Figure S1.** Photograph showing various appearances of seeds and grain pericarp in rice landraces representative for Group 1 and Group 2. The gray circle with diameter 2.2 cm used as a scale bar

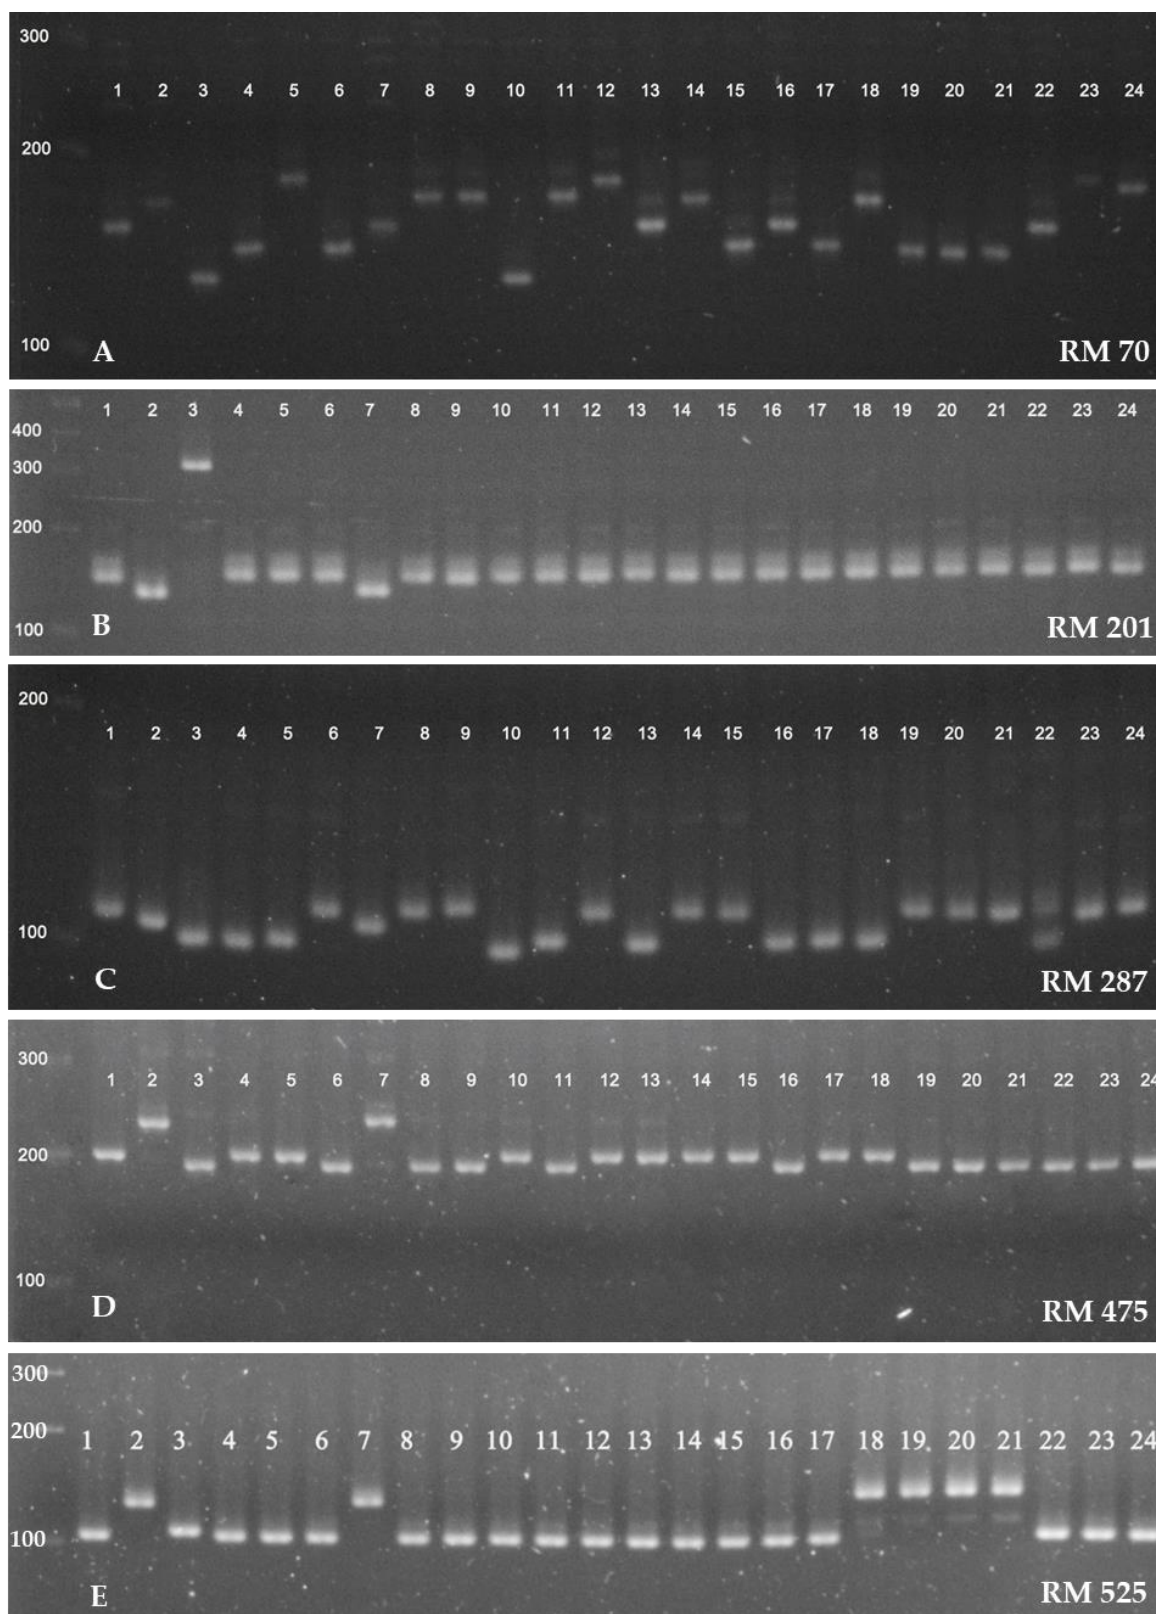

**Figure S2.** Gel pictures for banding of the 24 representative rice accessions with the markers: RM70 (A), RM201 (B), RM287 (C), RM475 (D), and RM525 (E). #1 - Milyang 23; #2 - Nipponbare; #3 - *O. rufipogon*; from #4 to #24: AGI-1 to AGI-24

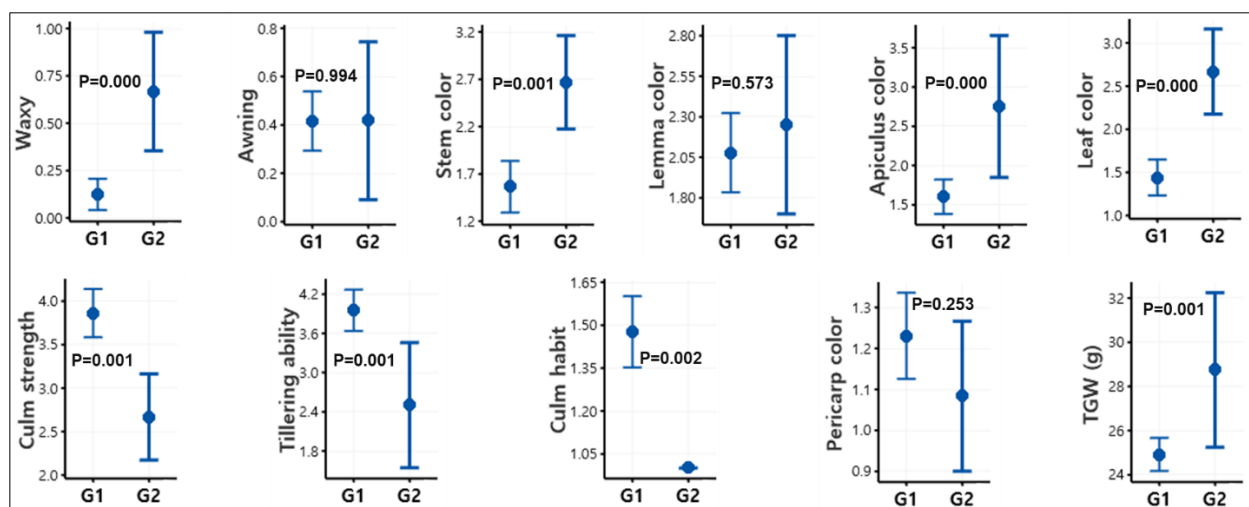

**Figure S3.** Comparison of the means for 11 agro-morphological traits between two subgroups by t-tests

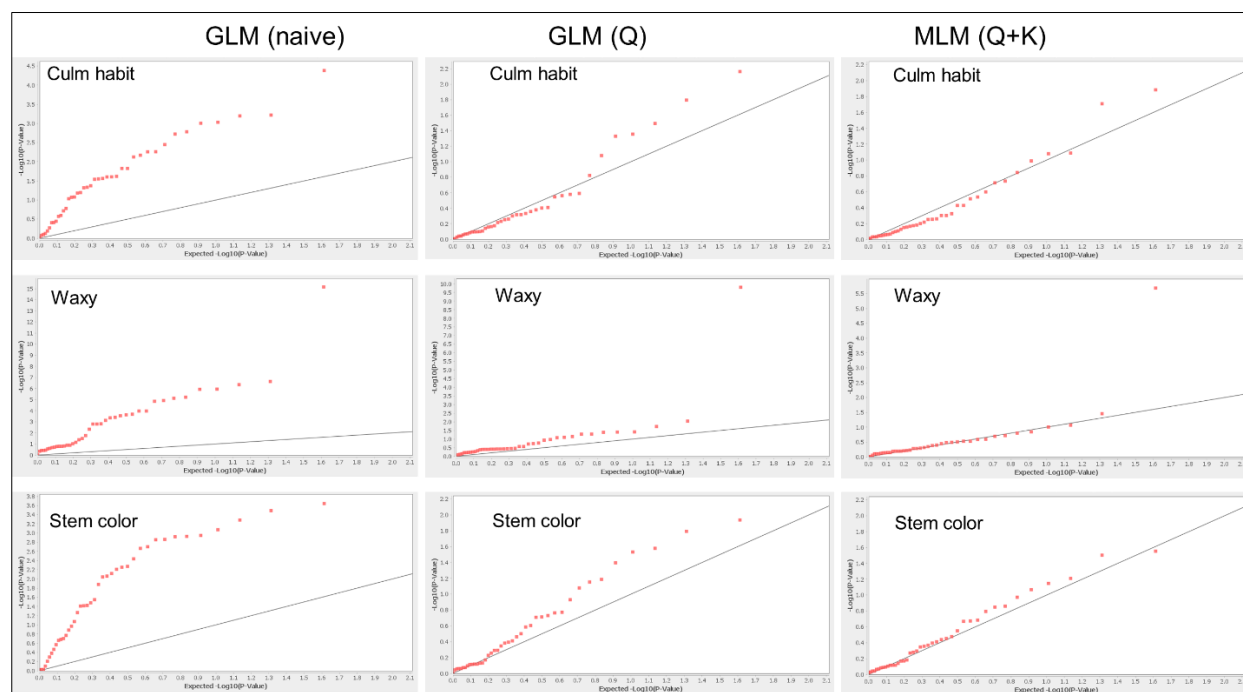

**Figure S4.** Quantile-quantile (Q-Q) plot of the marker-trait association by naive GLM, GLM with Q and MLM with Q + K for culm habit, waxy, and stem color
