# Supplementary material for: Genetic Structure and Geographical Differentiation of Traditional Rice (Oryza sativa L.) from Northern Vietnam
Source: Plants (Basel). 2021 Oct 3;10(10):2094. doi: 10.3390/plants10102094 (PMC8540186; doi:10.3390/plants10102094)
Supplement: Supplementary file 1 [file plants-10-02094-s001.zip › plants-1391621-supplementary/Tables S1-S11.xlsx]

## Sheet: Table S1
Table S1. Description of 98 rice accessions used for this study and raw data obtained from STRUCTURE and four subspecies-specific markers
AGI collection					Subspecies-specific markers 1)
ID	Name	Inferred ancestry		Subgroup	ORF100	Cat1-DEL	ORF29	Pgi1-NDEL	subspecies	Ecological zone 2)
		Q1	Q2
AGI-1	Du bao Hoa Binh	0.999	0.001	Group 1	D	D	ND	ND	Indica	NW
AGI-2	Khau lai thua Cao Bang	0.998	0.002	Group 1	ND	D	D	ND	Indica	NE
AGI-3	Trung trang Tuyen Quang	0.996	0.004	Group 1	D	D	ND	ND	Indica	NE
AGI-4	Hoa vang Thai Binh	0.003	0.997	Group 2	ND	ND	D	D	Japonica	RRD
AGI-5	Bat den Thanh Hoa	0.999	0.001	Group 1	D	D	ND	ND	Indica	NCC
AGI-6	Loc trang Son Tay	0.999	0.001	Group 1	ND	D	D	ND	Indica	RRD
AGI-7	Loc mo Ha Tinh	0.999	0.001	Group 1	D	D	ND	ND	Indica	NCC
AGI-8	Mo thu Bac can	0.999	0.001	Group 1	ND	D	D	ND	Indica	NE
AGI-9	Som Bac Giang	0.999	0.001	Group 1	D	D	ND	ND	Indica	NE
AGI-10	Sung rau Bac Giang	0.998	0.002	Group 1	D	D	ND	ND	Indica	NE
AGI-11	Chau som Thanh Hoa	0.999	0.001	Group 1	D	D	ND	ND	Indica	NCC
AGI-12	Loc tron Nghe An	0.995	0.005	Group 1	D	D	ND	ND	Indica	NCC
AGI-13	Hien do Hai Duong	0.998	0.002	Group 1	D	D	ND	ND	Indica	RRD
AGI-16	Mo van Tuyen Quang	0.984	0.016	Group 1	D	D	ND	ND	Indica	NE
AGI-17	Cham sai Tay Bac	0.997	0.003	Group 1	D	D	ND	ND	Indica	NW
AGI-18	Dau nghe Thai Binh	0.999	0.001	Group 1	ND	D	D	ND	Indica	RRD
AGI-19	Dau Thanh Hoa	0.999	0.001	Group 1	ND	D	D	ND	Indica	NCC
AGI-20	Nao Phu Tho	0.999	0.001	Group 1	ND	D	D	ND	Indica	NE
AGI-21	Nep mua do Hoa Binh	0.999	0.001	Group 1	D	D	ND	ND	Indica	NW
AGI-22	Khau no Tay Bac	0.999	0.001	Group 1	D	D	ND	ND	Indica	NW
AGI-24	Nep ga gay Hung yen	0.996	0.004	Group 1	D	D	ND	ND	Indica	RRD
AGI-25	Nep khau non Hoa Binh	0.998	0.002	Group 1	D	D	ND	ND	Indica	NW
AGI-26	Nep loc Thanh Hoa	0.002	0.998	Group 2	ND	ND	D	D	Japonica	NCC
AGI-32	Nep xo do Hoa Binh	0.001	0.999	Group 2	ND	ND	D	D	Japonica	NW
AGI-34	Nep cai Hai Duong	0.001	0.999	Group 2	ND	ND	D	D	Japonica	RRD
AGI-35	Nep cai Bac Giang	0.003	0.997	Group 2	ND	D	D	D	Japonica	NE
AGI-36	Nep van Thanh Hoa	0.003	0.997	Group 2	ND	D	D	D	Japonica	NCC
AGI-40	Gie vang Nghe An	0.001	0.999	Group 2	ND	D	D	D	Japonica	NCC
AGI-43	Toc tay Lao cai	0.999	0.001	Group 1	D	D	ND	ND	Indica	NW
AGI-47	Nep rau trang Hoa Binh	0.997	0.003	Group 1	D	D	ND	ND	Indica	NW
AGI-48	Nep huong Thai Binh	0.001	0.999	Group 2	ND	ND	D	D	Japonica	RRD
AGI-49	Nep chanh Ha Dong	0.999	0.001	Group 1	D	D	ND	ND	Indica	RRD
AGI-50	Khau lai dang Cao Bang	0.002	0.998	Group 2	ND	ND	D	D	Japonica	NE
AGI-51	Te cay Hoa Binh	0.999	0.001	Group 1	D	D	ND	ND	Indica	NW
AGI-53	Nep cai Nghe An	0.996	0.004	Group 1	D	D	ND	ND	Indica	NCC
AGI-54	Du Ninh Binh	0.998	0.002	Group 1	D	D	ND	ND	Indica	RRD
AGI-55	Cu du Ha Tinh	0.992	0.008	Group 1	D	D	ND	ND	Indica	NCC
AGI-56	Nep tien Ha Tinh	0.997	0.003	Group 1	D	D	ND	ND	Indica	NCC
AGI-57	Hien trang Bac Giang	0.996	0.004	Group 1	D	D	ND	ND	Indica	NE
AGI-58	Hom Thai Binh	0.989	0.011	Group 1	D	D	ND	ND	Indica	RRD
AGI-60	Mua ray ruong Hoa Binh	0.995	0.005	Group 1	D	D	ND	ND	Indica	NW
AGI-61	Dau Hai Duong	0.997	0.003	Group 1	D	D	ND	ND	Indica	RRD
AGI-62	Ven thap Thanh Hoa	0.999	0.001	Group 1	D	D	ND	ND	Indica	NCC
AGI-63	Bang muon Nghe An	0.999	0.001	Group 1	D	D	ND	ND	Indica	NCC
AGI-64	Gie som Son Tay	0.997	0.003	Group 1	D	D	ND	ND	Indica	RRD
AGI-65	Gie nuoc muon Phu Tho	0.999	0.001	Group 1	D	D	ND	ND	Indica	NE
AGI-66	Gie nuoc Vinh Phuc	0.996	0.004	Group 1	ND	D	D	ND	Indica	RRD
AGI-68	Gie vo Hai Duong	0.999	0.001	Group 1	D	D	ND	ND	Indica	RRD
AGI-70	Gie hai cui Bac Ninh	0.998	0.002	Group 1	D	D	ND	ND	Indica	RRD
AGI-71	Gie hoa Ha Tinh	0.995	0.005	Group 1	D	D	ND	ND	Indica	NCC
AGI-72	Gie hoa Vinh Phuc	0.997	0.003	Group 1	ND	D	D	ND	Indica	RRD
AGI-75	Gie lau Hoa Binh	0.997	0.003	Group 1	ND	D	D	ND	Indica	NW
AGI-79	Gie trang Thanh Hoa	0.998	0.002	Group 1	ND	D	D	ND	Indica	NCC
AGI-80	Gie do Thanh Hoa	0.999	0.001	Group 1	D	D	ND	ND	Indica	NCC
AGI-82	Gie noi Ha Dong	0.999	0.001	Group 1	D	D	ND	ND	Indica	RRD
AGI-84	Gie dong Thai Nguye	0.979	0.021	Group 1	D	D	ND	ND	Indica	NE
AGI-94	Gie nuoc Ninh Binh	0.999	0.001	Group 1	D	D	ND	ND	Indica	RRD
AGI-95	Gie soc Nam Dinh	0.996	0.004	Group 1	ND	D	D	ND	Indica	RRD
AGI-97	Gie Quang Binh	0.998	0.002	Group 1	D	D	ND	ND	Indica	NCC
AGI-98	Gie Phu Tho	0.984	0.016	Group 1	D	D	ND	ND	Indica	NE
AGI-99	Chao dai Nghe An	0.998	0.002	Group 1	ND	D	D	ND	Indica	NCC
AGI-100	Ba la Bac Can	0.999	0.001	Group 1	D	D	ND	ND	Indica	NE
AGI-101	Lua luc Son Tay	0.997	0.003	Group 1	D	D	ND	ND	Indica	RRD
AGI-107	Te hom Hung Yen	0.998	0.002	Group 1	ND	D	D	ND	Indica	RRD
AGI-108	Hin ap be Nam Dinh	0.998	0.002	Group 1	D	D	ND	ND	Indica	RRD
AGI-112	Di do Hai Duong	0.997	0.003	Group 1	D	D	ND	ND	Indica	RRD
AGI-114	Du lun Hai Duong	0.999	0.001	Group 1	D	D	ND	ND	Indica	RRD
AGI-115	Di dong Nam Dinh	0.996	0.004	Group 1	D	D	ND	ND	Indica	RRD
AGI-117	Chiem trang vi Hai phong	0.953	0.047	Group 1	D	D	ND	ND	Indica	RRD
AGI-118	Tep Nghe An	0.932	0.068	Group 1	D	D	ND	ND	Indica	NCC
AGI-119	Ta vong	0.424	0.576	Admixture	Hete	Hete	Hete	Hete	inter	NW
AGI-120	Nep Chiem	0.889	0.111	Group 1	D	D	ND	ND	Indica	NW
AGI-121	B'le la	0.999	0.001	Group 1	D	D	ND	ND	Indica	NW
AGI-122	Lua goc do	0.964	0.036	Group 1	D	D	ND	ND	Indica	S (SCC)
AGI-123	Lua ven dang 1	0.998	0.002	Group 1	D	D	ND	ND	Indica	NCC
AGI-124	Ble tu	0.285	0.715	Group 2	ND	ND	D	D	Japonica	NW
AGI-125	Khau hang khoai	0.224	0.776	Group 2	ND	ND	D	D	Japonica	NW
AGI-126	Ple lia	0.302	0.698	Group 2	ND	ND	D	D	Japonica	NCC
AGI-127	Khau tan nhe	0.114	0.886	Group 2	ND	ND	D	D	Japonica	NW
Check-group
ID	Name	Inferred ancestry		Subgroup	Subspecies-specific markers 1)				Subtype	Ecological zone 2)
		Q1	Q2		ORF100	Cat1-DEL	ORF29	Pgi1-NDEL
VN1	OM 6916	0.998	0.002	Group 1	D	D	ND	ND	Indica	S (MRD)
VN2	OM 2395	0.996	0.004	Group 1	D	D	ND	ND	Indica	S (MRD)
VN8	OM 3536	0.995	0.005	Group 1	D	D	ND	ND	Indica	S (MRD)
VN9	OM 4900	0.999	0.001	Group 1	D	D	ND	ND	Indica	S (MRD)
VN19	IR64	0.995	0.005	Group 1	D	D	ND	ND	Indica	Inter (IRRI)
RWG-023	HanyangCho	0.945	0.055	Admixture	ND	D	D	ND	Aus	Inter (Korea)
RWG-043	Pukhi	0.608	0.392	Admixture	ND	D	D	ND	Aus	Inter (Pakistan)
RWG-137	IR40	0.838	0.162	Group 1	D	D	ND	ND	Indica	Inter (IRRI)
RWG-148	Ilpum	0.006	0.994	Group 2	ND	ND	D	D	Japonica	Inter (Korea)
RWG-154	Hwaseong	0.002	0.998	Group 2	ND	ND	D	D	Japonica	Inter (Korea)
RWG-156	Hwayeong	0.004	0.996	Group 2	ND	ND	D	D	Japonica	Inter (Korea)
RWG-157	Dongjin	0.001	0.999	Group 2	ND	ND	D	D	Japonica	Inter (Korea)
RWG-165	Milyang 23	0.938	0.062	Group 1	ND	D	D	ND	Indica(Tongil)	Inter (Korea)
RWG-166	Samgang Byeo	0.999	0.001	Group 1	D	D	ND	ND	Indica(Tongil)	Inter (Korea)
RWG-205	Taebaeg Byeo	0.998	0.002	Group 1	D	D	ND	ND	Indica(Tongil)	Inter (Korea)
RWG-262	Nongan Byeo	0.485	0.515	Admixture	ND	ND	D	D	Japonica	Inter (Korea)
CNU1	Nipponbare	0.021	0.979	Group 2	ND	ND	D	D	Japonica	Inter (Japan)
CNU19	Kasalath	0.521	0.479	Admixture	D	D	ND	ND	Aus	Inter (India)
CNU20	O. rufipogon	0.815	0.185	Admixture	ND	D	D	ND	O. rufipogon	Inter (Malaysia)
1) INDEL genotypes were classified by letters, D as deletion, ND as non deletion. For two makers ORF100 and Cat1-INDEL: D is used to detect Indica type, ND is used to detect Japonica type; by contrast, for two makers ORF29 and Pig1-INDEL: D is used to detect Japocica type, ND is used to detect Indica type
2) Ecological zone: NW, Northwest; NE, Northeast; RRD, Red river delta; NCC, North central coast; S, Southern Vietnam; SCC, south-central coast; MRD, Mekong Rivel Delta; Inter, International

## Sheet: Table S2
Table S2. Description of scoring system
Scale	waxy	awning	culm habit	leaf color	pericarp color	stem color	culm strength	tillering ability	Lemma color	apiculus color
1	non-glutinous	absent	erect type	light green	straw	light green	weak	low (<10)	straw	straw
2	glutinous	awned	open type	dark green	purple				brown	brown
3						dark green	intermediate	medium (10-19)	reddish to light purple	reddish to light purple
4									purple	purple
5						purple	strong	high (>19)

## Sheet: Table S3
Table S3. Correlation coefficients among 11 traits in Vietnamese landraces
Trait 1)	Waxy	Awn	SC	LC	LMC	ApiC	CS	TA	CH	PC
Awn	-0.036
SC	0.471**	0.065
LC	0.485**	0.115	0.871**
LMC	0.078	0.129	0.124	0.161
ApiC	0.279	-0.035	0.341*	0.336*	0.301*
CS	-0.241	-0.076	-0.386*	-0.348*	-0.063	-0.228
TA	0.012	-0.056	0.006	-0.017	-0.113	-0.249	0.151
CH	-0.088	-0.145	-0.139	-0.193	0.077	-0.066	0.215	0.145
PC	-0.191	0.254	0.046	0.047	0.268	0.073	-0.145	0.084	-0.175
TGW	0.078	0.154	0.203	0.238	0.229	0.431**	-0.313*	-0.116	-0.16	0.145
1) Waxy, glutinous or non-glutinous; Awn, awning; SC, stem color; LC, leaf color; LMC, lemma color; ApiC, apiculus color; CS, Culm strength; TA, tillering ability; CH, culm hablit; PC, pericarp color; TGW, 1000-grain weight.

## Sheet: Table S4
Table S4. Characteristics of 45 DNA markers used for this study
Marker	Chr.	Expected band size (bp)	Position	Type of marker	Forward Primer	Reverse Primer	Reference
RM151	1	197	3945582	SSR	TGCCTCTTCCCTGGCTCCCCTG	GGCATGCCGAATGAAATGCATG	Gramene
RM140	1	261	29384585	SSR	GGCTGCTCATCAGCTGCATGCG	TCGGCAGTGGTAGAGTTTGATCTGC	Gramene
RM423	2	273	3836888	SSR	AGCACCCATGCCTTATGTTG	CCTTTTTCAGTAGCCCTCCC	Gramene
RM424	2	239	11389946	SSR	TTTGTGGCTCACCAGTTGAG	TGGCGCATTCATGTCATC	Gramene
RM475	2	235	20404790	SSR	CCTCACGATTTTCCTCCAAC	ACGGTGGGATTAGACTGTGC	Gramene
RM525	2	131	28267534	SSR	GGCCCGTCCAAGAAATATTG	CGGTGAGACAGAATCCTTACG	Gramene
RM60	3	165	107053	SSR	AGTCCCATGTTCCACTTCCG	ATGGCTACTGCCTGTACTAC	Gramene
RM85	3	107	36348245	SSR	CCAAAGATGAAACCTGGATTG	GCACAAGGTGAGCAGTCC	Gramene
RM153	5	201	189782	SSR	GCCTCGAGCATCATCATCAG	ATCAACCTGCACTTGCCTGG	Gramene
RM421	5	234	23976333	SSR	AGCTCAGGTGAAACATCCAC	ATCCAGAATCCATTGACCCC	Gramene
RM480	5	225	27313250	SSR	GCTCAAGCATTCTGCAGTTG	GCGCTTCTGCTTATTGGAAG	Gramene
RM253	6	141	5426497	SSR	TCCTTCAAGAGTGCAAAACC	GCATTGTCATGTCGAAGCC	Gramene
RM70	7	170	22776870	SSR	GTGGACTTCATTTCAACTCG	GATGTATAAGATAGTCCC	Gramene
RM182	7	346	21505341	SSR	TGGGATGCAGAGTGCAGTTGGC	CGCAGGCACGGTGCCTTGTAAG	Gramene
RM247	7	131	2678661	SSR	TAGTGCCGATCGATGTAACG	CATATGGTTTTGACAAAGCG	Gramene
RM149	8	253	24721365	SSR	GCTGACCAACGAACCTAGGCCG	GTTGGAAGCCTTTCCTCGTAACACG	Gramene
RM284	8	141	21142348	SSR	ATCTCTGATACTCCATCCATCC	CCTGTACGTTGATCCGAAGC	Gramene
RM245	9	150	22275471	SSR	ATGCCGCCAGTGAATAGC	CTGAGAATCCAATTATCTGGGG	Gramene
RM201	9	158	20174289	SSR	CTCGTTTATTACCTACAGTACC	CTACCTCCTTTCTAGACCGATA	Gramene
RM242	9	225	18810067	SSR	GGCCAACGTGTGTATGTCTC	TATATGCCAAGACGGATGGG	Gramene
RM278	9	141	19320450	SSR	GTAGTGAGCCTAACAATAATC	TCAACTCAGCATCTCTGTCC	Gramene
RM244	10	163	5012564	SSR	CCGACTGTTCGTCCTTATCA	CTGCTCTCGGGTGAACGT	Gramene
RM21	11	157	19639358	SSR	ACAGTATTCCGTAGGCACGG	GCTCCATGAGGGTGGTAGAG	Gramene
RM287	11	118	17233680	SSR	TTCCCTGTTAAGAGAGAAATC	GTGTATTTGGTGAAAGCAAC	Gramene
RM277	12	124	18319022	SSR	CGGTCAAATCATCACCTGAC	CAAGGCTTGCAAGGGAAG	Gramene
ID-LTG3-1	3	190/200	220770	InDel	GCCTCCTCGTCAACTACTGC	AGGAAATTAAAGGCACGCAGA	This study
ID-LABA1	4	164/182	26199625	InDel	ATGTGTTAGAGCCGTGTCTGAG	GGAGTCCATGGATATTTACCGGAT	This study
ID-An1	4	223/235	16726801	InDel	GTCGTGGACGGACTACTTGT	ATAGAGTCACGGTCGCTGAG	This study
ID-Pi9	6	291/397	10375347	InDel	GCTGTGCTCCAAATGAGGAT	GCGATCTCACATCCTTTGCT	This study
ID-Glu23	6	173/196	1766884	InDel	TGCAGAGATCTTCCACAGCA	GCTGGTCGTCACGCTGAG	[23]
ID-J2	8	200/246	23996320	InDel	TGCCAATATCTCTTGCCTCT	TCAGTTGTGACAAGCCACACT	This study
ID-GW8.1	8	210/240	21576150	InDel	TGCATGTTTATCCCAGTTTCA	TGAGGCCAAAGAAAGCAGAT	This study
ID-LTG10-4	10	185/195	20840725	InDel	GGACAACACTTTACACCAGAATTG	TCAAATTATACACTCCCTCTGCTC	This study
ID-Pia STS	11	110/120	6542396	InDel	CTTTTGAGCTTGATTGGTCTGC	CTATTGCACCAGAGGGACCAG	This study
ID-Pikh-1	11	216/359	25264138	InDel	CAATCTCCAAAGTTTTCAGG	GCTTCAATCACTGCTAGACC	This study
Marker	Chr.	SNP	Position	Type of marker	Primer_Allele (FAM)	Primer_Allele (HEX)	Primer_Common	Reference
KJ05_003	5	A/G	591451	KASP	CGAAGAACTTTGCTTCACCTCTGT	GAAGAACTTTGCTTCACCTCTGC	ATCTGGTCTCCAGCACTTGAGCAAT	[37]
KJ06_071	6	C/T	21799623	KASP	CAACACAACACAACAACCATGCAC	CCAACACAACACAACAACCATGCAT	AGCTCACACGACACATATCGGCAT	[37]
KJ07_007	7	T/G	1317768	KASP	AAATCCTGGCATGCAGCATTTATGATA	ATCCTGGCATGCAGCATTTATGATC	TAACTACAAAGGTGTGAAGAGGACATGAA	[37]
KJ07_039	7	C/T	15311521	KASP	TCAAATAACCAAATCTAAAATTCACTTCTTTG	CAAATAACCAAATCTAAAATTCACTTCTTTA	GTAGTAGTACCACAGGATCCTAAGTTTAA	[37]
KJ08_003	8	A/G	1282290	KASP	GCAGCCTAGCAGAAGTGCAGAA	CAGCCTAGCAGAAGTGCAGAG	CGGGGCACCCTCTAGTTATATTTGTT	[37]
KJ09_045	9	A/C	12716578	KASP	ATCATTTCCATGATGAAGGATAGAATAGAT	CATTTCCATGATGAAGGATAGAATAGAG	GTACGTGAGTATGTATAAGACATGCAATAT	[37]
KJ11_025	11	C/T	7667318	KASP	AAATAAAAACTAATTGCACAGTTAGAAGGG	AAAAATAAAAACTAATTGCACAGTTAGAAGGA	CTAATTAGGCTTAAAAGATTCATCTCGCAA	[37]
KJ11_091	11	A/G	23553576	KASP	TTAGACAATGTGCTGATATAGCTTTTAT	TAGACAATGTGCTGATATAGCTTTTAC	CATTTCAGACAGTTAGCCCTGCCAA	[37]
KJ12_009	12	C/T	4218137	KASP	GCACTATGCTCATTACAAACAACC	ACTGCACTATGCTCATTACAAACAACT	CACAATCAGAACTCATGCTGCTTCTTTAT	[37]
KJ12_055	12	A/G	21484803	KASP	ATATATATTAGGTTAAGAATTTTTTGATGGCT	ATATATATTAGGTTAAGAATTTTTTGATGGCC	CTCTTATGGGCATAGGCGGATCTAA	[37]

## Sheet: Table S5
Table S5. Genetic diversity characteristics of 45 DNA markers
Marker	Major.Allele.Frquency	Genotype No	Allele No.	Availability	Gene Diversity	Heterozygosity	PIC
RM151	0.219388	15	13	1	0.879633	0.0204082	0.868355
RM140	0.651042	5	3	0.979592	0.510362	0.0208333	0.453031
RM423	0.790816	3	2	1	0.330852	0.0102041	0.27612
RM424	0.489796	8	6	1	0.679769	0.0204082	0.637252
RM475	0.505102	4	3	1	0.608236	0.0306122	0.532654
RM525	0.678571	5	4	1	0.486933	0.0102041	0.437703
RM60	0.520408	2	2	1	0.499167	0	0.374583
RM85	0.479592	4	3	1	0.62828	0.0204082	0.554755
RM153	0.806122	3	3	1	0.330904	0	0.305701
RM421	0.72449	5	5	1	0.414827	0	0.351502
RM480	0.872449	4	3	1	0.226	0.0102041	0.206457
RM253	0.56383	5	5	0.959184	0.63196	0	0.598316
RM70	0.25	12	10	1	0.845012	0.0204082	0.827216
RM182	0.367347	6	5	1	0.752187	0.0204082	0.71301
RM247	0.744898	4	4	1	0.413786	0	0.378748
RM149	0.489796	3	3	1	0.546647	0	0.443135
RM284	0.690722	2	2	0.989796	0.427251	0	0.335979
RM245	0.5	4	4	1	0.604956	0	0.52968
RM201	0.75	4	3	1	0.392076	0.0102041	0.340829
RM242	0.295918	6	6	1	0.804665	0	0.7771
RM278	0.734694	3	3	1	0.425031	0	0.386419
RM244	0.576531	7	4	1	0.604071	0.0816327	0.559396
RM21	0.520408	7	6	1	0.665973	0.0204082	0.62925
RM287	0.433673	5	4	1	0.64343	0.0102041	0.573518
RM277	0.816327	3	3	1	0.306539	0	0.270436
Mean	0.578877	5.16	4.36	0.997143	0.546342	0.0122619	0.494446
ID-LTG3-1	0.709184	3	2	1	0.412484	0.0102041	0.327413
ID-LABA1	0.852041	3	2	1	0.252135	0.0102041	0.220349
ID-An1	0.545918	3	2	1	0.495783	0.0306122	0.372883
ID-Pi9	0.75	3	2	1	0.375	0.0102041	0.304688
ID-Glu23	0.821429	3	2	1	0.293367	0.0102041	0.250335
ID-J2	0.877551	3	3	1	0.219075	0	0.202388
ID-GW8.1	0.811224	3	2	1	0.306279	0.0102041	0.259375
ID-LTG10-4	0.806122	2	2	1	0.312578	0	0.263726
ID-Pia STS	0.637755	3	2	1	0.462047	0.0306122	0.355303
ID-Pikh-1	0.857143	2	2	1	0.244898	0	0.21491
Mean	0.766837	2.8	2.1	1	0.337365	0.0112245	0.277137
KJ05_003	0.877551	2	2	1	0.21491	0	0.191817
KJ06_071	0.938776	2	2	1	0.114952	0	0.108345
KJ07_007	0.90625	2	2	0.979592	0.169922	0	0.155485
KJ07_039	0.819277	2	2	0.846939	0.296124	0	0.252279
KJ08_003	0.609375	3	2	0.979592	0.476074	0.0104167	0.362751
KJ09_045	0.880208	3	2	0.979592	0.210883	0.0520833	0.188647
KJ11_025	0.897959	2	2	1	0.183257	0	0.166465
KJ11_091	0.819149	2	2	0.959184	0.296288	0	0.252395
KJ12_009	0.806122	2	2	1	0.312578	0	0.263726
KJ12_055	0.938776	2	2	1	0.114952	0	0.108345
Mean	0.849344	2.2	2	0.97449	0.238994	0.00625	0.205026
Overall mean	0.68075	3.97778	3.33333	0.992744	0.431603	0.0106954	0.381839

## Sheet: Table S6
Table S6. A list of accessions with rare alleles in this study
Marker	Chromosome	Rare Allele (bp)	Rare Allele frequence	Accessions with rare allele
RM151	1	150	0.0102041	AGI-6
RM151	1	330	0.0102041	AGI-98
RM151	1	320	0.0255102	AGI-2; AGI-80; AGI-97
RM151	1	180	0.0306122	AGI-47; RWG-023; CNU-20
RM151	1	280	0.0408163	AGI-62; AGI-75; AGI-85; AGI-119
RM424	2	210	0.0102041	AGI-97
RM424	2	190	0.0204082	AGI-68; CNU-19
RM525	2	105	0.0204082	CNU-19; CNU-20
RM421	5	250	0.0102041	RWG-043
RM421	5	260	0.0102041	RWG-023
RM421	5	270	0.0102041	CNU-20
RM480	5	170	0.0153061	AGI-97; RWG-166
KJ06_071	6	A	0.061	AGI-4; RWG-023; RWG-043; CNU-1; CNU-19; CNU-20
RM247	7	135	0.0306122	AGI-12; AGI-26; CNU-19
RM70	7	220	0.0204082	RWG-043; CNU-19
RM70	7	110	0.0357143	AGI-53; AGI-68; AGI-75; AGI-82
RM70	7	180	0.0408163	AGI-24; AGI-72; AGI-114; AGI-126
RM70	7	195	0.0408163	AGI-25; AGI-99; AGI-121; AGI-125
ID-J2	8	230	0.0204082	AGI-4; CNU-20
RM201	9	320	0.0408163	RWG-023; RWG-043; CNU-19; CNU-20
RM245	9	155	0.0408163	AGI-8; AGI-54; AGI-71; RWG-023
RM21	11	150	0.0204082	RWG-165; RWG-205
RM287	11	95	0.0408163	AGI-7; AGI-62; RWG-023; CNU19
RM277	12	135	0.0204082	VN8; RWG-137

## Sheet: Table S7
Table S7. Comparison of specific allele frequency (%) between regions
Regions	RM21-165	RM21-140	RM21-130	RM70-220	RM70-187	RM70-195	RM201-320	RM278-155	RM287-95	RM424-180	RM424-160	ID-J2-200	Glu23-220	KJ06_071-A
NW	12.5	0	12.5	0	42.9	75	0	8.3	0	6.7	23.1	10	11.8	0
NE	25	0	0	0	42.9	0	0	25	0	6.7	23.1	0	47.1	0
RRD	18.75	60	37.5	0	14.2	0	0	16.7	0	46.6	0	0	23.5	16.7
NCC	18.75	0	0	0	0	25	0	50	50	13.3	7.7	0	17.6	0
S	25	0	0	0	0	0	0	0	0	6.7	7.7	0	0	0
Inter	0	40	50	100	0	0	100	0	50	20	38.4	90	0	83.3
Total	100	100	100	100	100	100	100	100	100	100	100	100	100	100
NW, Northwest; NE, Northeast; RRD, Red river delta; NCC, North central coast; S, South; Inter, International

## Sheet: Table S8 
Table S8. Genotype data of indica/japonica landraces at selected loci (RM242, RM277, and RM424)
ID	Subgroup	Subspecies	Ecological zone 1)	RM242-225	RM242-215	RM242-205	RM242-195	RM242-190	RM242-180	RM277-130	RM277-125	RM424-210	RM424-190	RM424-180	RM424-170	RM424-160	RM424-130
AGI-4	Group 2	Japonica	RRD	0	0	0	0	0	1	0	1	0	0	0	0	0	1
AGI-26	Group 2	Japonica	NCC	0	0	0	0	0	1	0	1	0	0	0	0	0	1
AGI-32	Group 2	Japonica	NW	0	0	0	0	0	1	0	1	0	0	0	0	0	1
AGI-34	Group 2	Japonica	RRD	0	0	0	0	0	1	0	1	0	0	0	0	0	1
AGI-35	Group 2	Japonica	NE	0	0	0	0	0	1	0	1	0	0	0	0	0	1
AGI-36	Group 2	Japonica	NCC	0	0	0	0	0	1	0	1	0	0	0	0	0	1
AGI-40	Group 2	Japonica	NCC	0	0	0	0	0	1	0	1	0	0	0	0	0	1
AGI-48	Group 2	Japonica	RRD	0	0	0	0	0	1	0	1	0	0	0	0	0	1
AGI-50	Group 2	Japonica	NE	0	0	0	0	0	1	0	1	0	0	0	0	0	1
AGI-124	Group 2	Japonica	NW	0	0	0	0	1	0	1	0	0	0	0	0	0	1
AGI-125	Group 2	Japonica	NW	0	0	0	0	1	0	1	0	0	0	0	0	0	1
AGI-126	Group 2	Japonica	NCC	0	0	0	1	0	0	1	0	0	0	0	0	0	1
AGI-127	Group 2	Japonica	NW	0	0	0	1	0	0	1	0	0	0	0	0	0	1
AGI-5	Group 1	Indica	NCC	0	1	0	0	0	0	1	0	0	0	0	1	0	0
AGI-7	Group 1	Indica	NCC	0	1	0	0	0	0	1	0	0	0	0	1	0	0
AGI-11	Group 1	Indica	NCC	0	0	0	0	1	0	1	0	0	0	0	1	0	0
AGI-12	Group 1	Indica	NCC	0	0	1	0	0	0	1	0	0	0	0	1	0	0
AGI-19	Group 1	Indica	NCC	0	0	0	1	0	0	1	0	0	0	0	1	0	0
AGI-53	Group 1	Indica	NCC	0	1	0	0	0	0	1	0	0	0	0	1	0	0
AGI-55	Group 1	Indica	NCC	1	0	0	0	0	0	1	0	0	0	0	1	0	0
AGI-56	Group 1	Indica	NCC	0	1	0	0	0	0	1	0	0	0	0	1	0	0
AGI-62	Group 1	Indica	NCC	1	0	0	0	0	0	1	0	0	0	0	1	0	0
AGI-63	Group 1	Indica	NCC	0	0	1	0	0	0	1	0	0	0	1	0	0	0
AGI-71	Group 1	Indica	NCC	1	0	0	0	0	0	1	0	0	0	0	1	0	0
AGI-79	Group 1	Indica	NCC	1	0	0	0	0	0	1	0	0	0	1	0	0	0
AGI-80	Group 1	Indica	NCC	0	1	0	0	0	0	1	0	0	0	0	1	0	0
AGI-97	Group 1	Indica	NCC	0	1	0	0	0	0	1	0	1	0	0	0	0	0
AGI-99	Group 1	Indica	NCC	1	0	0	0	0	0	1	0	0	0	0	1	0	0
AGI-118	Group 1	Indica	NCC	0	1	0	0	0	0	1	0	0	0	0	0	1	0
AGI-123	Group 1	Indica	NCC	1	0	0	0	0	0	1	0	0	0	0	1	0	0
AGI-2	Group 1	Indica	NE	0	0	0	0	1	0	1	0	0	0	0	1	0	0
AGI-3	Group 1	Indica	NE	0	1	0	0	0	0	1	0	0	0	0	0	1	0
AGI-8	Group 1	Indica	NE	0	0	0	1	0	0	1	0	0	0	0	1	0	0
AGI-9	Group 1	Indica	NE	0	0	0	0	1	0	1	0	0	0	0	1	0	0
AGI-10	Group 1	Indica	NE	0	0	0	1	0	0	1	0	0	0	0	0	1	0
AGI-16	Group 1	Indica	NE	0	0	0	0	0	1	1	0	0	0	0	1	0	0
AGI-20	Group 1	Indica	NE	0	0	0	1	0	0	1	0	0	0	0	1	0	0
AGI-57	Group 1	Indica	NE	1	0	0	0	0	0	1	0	0	0	0	1	0	0
AGI-65	Group 1	Indica	NE	0	1	0	0	0	0	1	0	0	0	0	1	0	0
AGI-84	Group 1	Indica	NE	1	0	0	0	0	0	1	0	0	0	1	0	0	0
AGI-98	Group 1	Indica	NE	1	0	0	0	0	0	1	0	0	0	0	1	0	0
AGI-100	Group 1	Indica	NE	1	0	0	0	0	0	1	0	0	0	0	1	0	0
AGI-1	Group 1	Indica	NW	0	0	0	0	1	0	1	0	0	0	0	1	0	0
AGI-17	Group 1	Indica	NW	0	0	1	0	0	0	1	0	0	0	0	1	0	0
AGI-21	Group 1	Indica	NW	0	1	0	0	0	0	1	0	0	0	0	1	0	0
AGI-22	Group 1	Indica	NW	0	1	0	0	0	0	1	0	0	0	0	1	0	0
AGI-25	Group 1	Indica	NW	0	0	1	0	0	0	1	0	0	0	0	1	0	0
AGI-43	Group 1	Indica	NW	1	0	0	0	0	0	1	0	0	0	0	1	0	0
AGI-47	Group 1	Indica	NW	1	0	0	0	0	0	1	0	0	0	0	0	1	0
AGI-51	Group 1	Indica	NW	1	0	0	0	0	0	1	0	0	0	0	1	0	0
AGI-60	Group 1	Indica	NW	0	1	0	0	0	0	1	0	0	0	0	1	0	0
AGI-75	Group 1	Indica	NW	0	0	1	0	0	0	1	0	0	0	1	0	0	0
AGI-120	Group 1	Indica	NW	0	0	1	0	0	0	1	0	0	0	0	0	1	0
AGI-121	Group 1	Indica	NW	0	1	0	0	0	0	1	0	0	0	0	0	1	0
AGI-6	Group 1	Indica	RRD	0	0	0	1	0	0	1	0	0	0	0	1	0	0
AGI-13	Group 1	Indica	RRD	0	0	0	1	0	0	1	0	0	0	0	1	0	0
AGI-18	Group 1	Indica	RRD	0	0	0	1	0	0	1	0	0	0	0	1	0	0
AGI-24	Group 1	Indica	RRD	0	1	0	0	0	0	1	0	0	0	0	1	0	0
AGI-49	Group 1	Indica	RRD	1	0	0	0	0	0	1	0	0	0	0	1	0	0
AGI-54	Group 1	Indica	RRD	0	1	0	0	0	0	1	0	0	0	0	1	0	0
AGI-58	Group 1	Indica	RRD	0	0	1	0	0	0	1	0	0	0	1	0	0	0
AGI-61	Group 1	Indica	RRD	0	1	0	0	0	0	1	0	0	0	0	1	0	0
AGI-64	Group 1	Indica	RRD	0	0	1	0	0	0	1	0	0	0	0	1	0	0
AGI-66	Group 1	Indica	RRD	0	0	1	0	0	0	1	0	0	0	1	0	0	0
AGI-68	Group 1	Indica	RRD	1	0	0	0	0	0	1	0	0	1	0	0	0	0
AGI-70	Group 1	Indica	RRD	0	1	0	0	0	0	1	0	0	0	0	1	0	0
AGI-72	Group 1	Indica	RRD	0	0	1	0	0	0	1	0	0	0	1	0	0	0
AGI-82	Group 1	Indica	RRD	1	0	0	0	0	0	0	1	0	0	0	1	0	0
AGI-94	Group 1	Indica	RRD	1	0	0	0	0	0	1	0	0	0	1	1	0	0
AGI-95	Group 1	Indica	RRD	1	0	0	0	0	0	1	0	0	0	0	1	0	0
AGI-101	Group 1	Indica	RRD	0	0	1	0	0	0	1	0	0	0	0	1	0	0
AGI-107	Group 1	Indica	RRD	0	1	0	0	0	0	1	0	0	0	1	0	0	0
AGI-108	Group 1	Indica	RRD	0	0	1	0	0	0	1	0	0	0	0	1	0	0
AGI-112	Group 1	Indica	RRD	0	0	1	0	0	0	1	0	0	0	0	1	0	0
AGI-114	Group 1	Indica	RRD	0	1	0	0	0	0	1	0	0	0	1	0	0	0
AGI-115	Group 1	Indica	RRD	0	0	1	0	0	0	1	0	0	0	1	0	0	0
AGI-117	Group 1	Indica	RRD	0	0	0	0	1	0	1	0	0	0	0	1	0	0
AGI-122	Group 1	Indica	S	0	0	1	0	0	0	1	0	0	0	0	0	1	0
2) Ecological zone: NW, Northwest; NE, Northeast; RRD, Red river delta; NCC, North central coast; S, South; Inter, International

## Sheet: Table S9
Table S9. Significant marker-trait accosiations in AGI collection detected by GLM (Q) and MLM (Q+K) models
Trait 1)	Marker	Chr	Position	GLM (Q)			MLM (Q+K)			Known gene
				marker_F	p	marker_Rsq	F	p 2)	Marker Rsq
Awn	RM475	2	20404790	6.17955	0.00336	0.14818	2.8919	ns	0.0789212
Awn	RM421	5	23976333	7.72725	0.00687	0.0934	4.80964	ns	0.0632838
CH	RM424	2	11389946	4.39354	0.00689	0.13794	3.5187	ns	0.144343
CS	RM201	9	20174289	13.899	0.00037504	0.13837	12.0134	0.000882871	0.138372	BC15/OsCTL1
CS	RM424	2	11389946	4.72024	0.0047	0.14907	4.08007	0.00998546	0.149079
LC	RM424	2	11389946	4.76815	0.00448	0.13083	3.8697	ns	0.138239
LC	DEL-GW8.1	8	21576150	7.82549	0.00658	0.07039	6.50101	ns	0.0768848
LC	RM284	8	21142348	7.47322	0.00785	0.06934	6.26226	ns	0.0735534
LMC	RM423	2	3836888	7.3833	0.00819	0.09059	6.00149	ns	0.0788538
TA	DEL-GW8.1	8	21576150	7.90558	0.00631	0.08535	7.77386	0.0067336	0.0985016	OsMTD1
TGW	DEL-GW8.1	8	21576150	9.66155	0.00267	0.10269	8.76266	0.0041289	0.102688
Waxy	DEL-Glu23	6	1766884	55.111	1.5823e-10	0.31081	26.566	2.0469e-06	0.34283	WAXY, GBSS1
Waxy	RM423	2	3836888	7.16629	0.00914	0.06569	1.57576	ns	0.0612039
1) Awn, awning; CH, culm hablit; CS, Culm strength; LC, leaf color; LMC, lemma color; TA, tillering ability; TGW, 1000-grain weight; Waxy, glutinous or non-glutinous
2) ns indicate no significance (P>0.01)

## Sheet: Table S10
Table S10. Multiple comparisons for significant marker-trait association detected by MLM (Q+K)
Trait 1)	Marker	P-value (Tukey's test)	P-value (GLM)	P-value (MLM)	Allele size (bp)	No. of accessions	Mean±SD 2)
TA	DEL-GW8.1	0.001	0.006	0.007	240	65	3.95±1.3A
					210	12	2.50±1.5B
TGW	DEL-GW8.1	0.001	0.003	0.004	240	65	24.92±3.0B
					210	12	28.73±5.5A
CS	RM424	<0.001	0.0047	0.00999	130	13	2.69±0.8B
					160	7	2.71±1.4B
					170	44	3.91±1.0A
					180	10	4.20±1.03A
1) TA, Tillering ability; TGW, 1000-grain weight; CS, culm strength
2) The numbers followed by different letters in each trait are significantly different at P＜ 0.05, based on Tukey's test.

[truncated: 1 more sheets: Table S11]
